# Supplementary material
Source: PubMed Central journal article supplement (PMC2175010)
Supplement: cmaj_178_2_153__1.pdf [file cmaj_178_2_153__1.pdf]

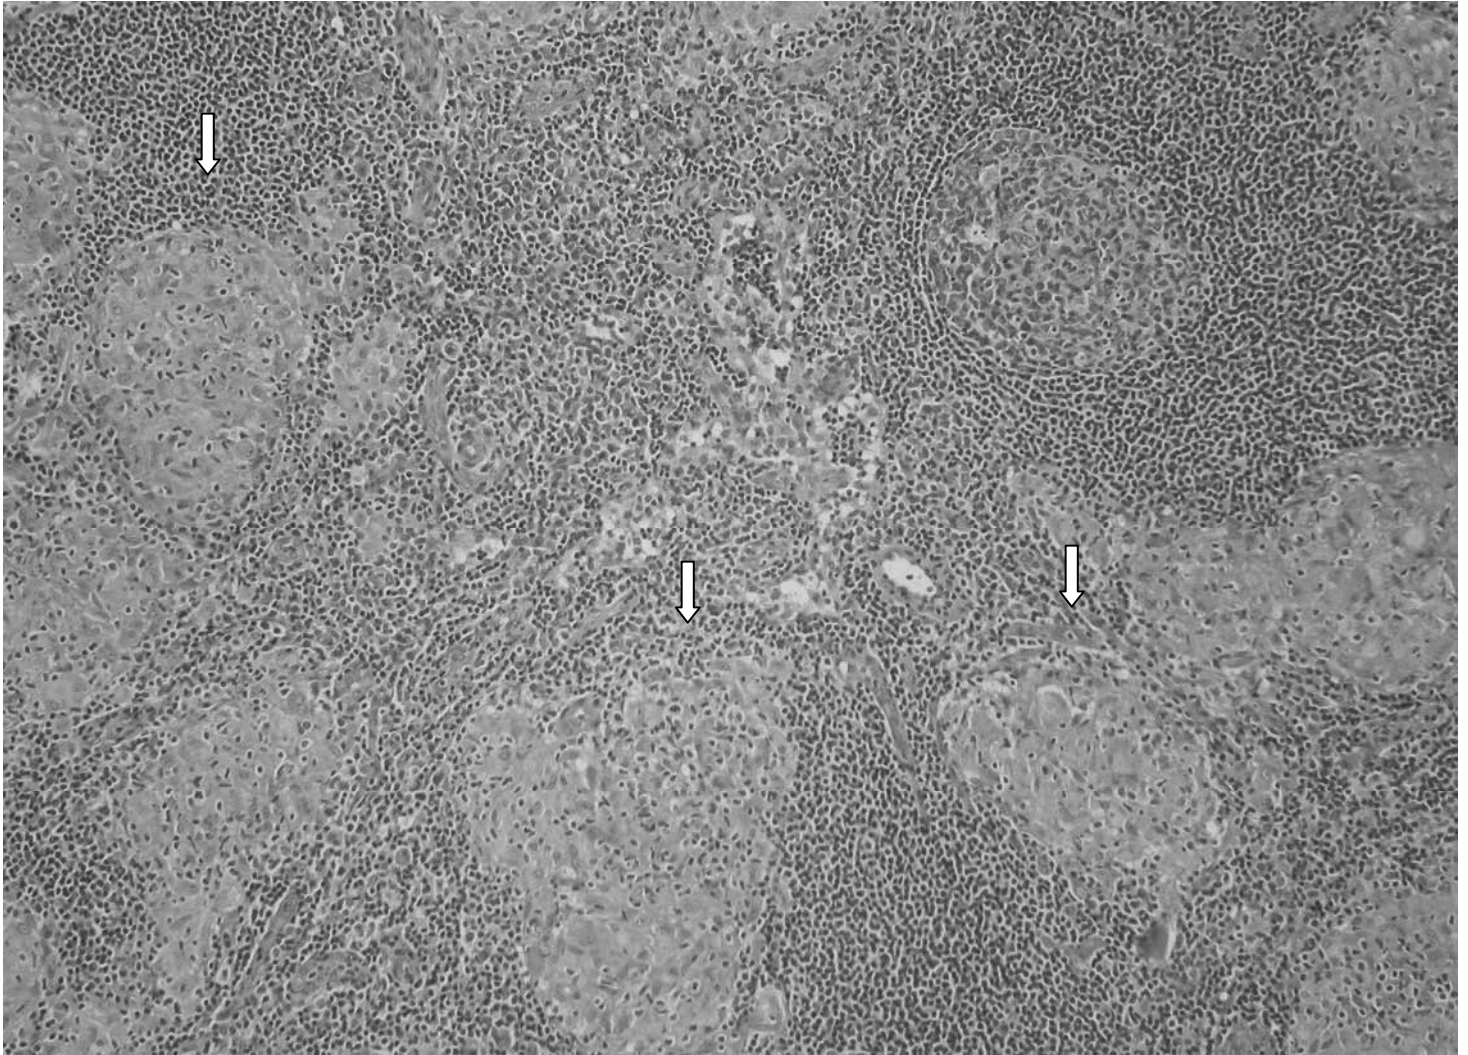

---

**Appendix 1:** Right axillary lymph node biopsy showing numerous noncaseating granulomata (arrows). Immunophenotyping of cell-surface antigens was performed by flow cytometry and demonstrated no evidence of lymphoma. Mycobacterial and fungal stains were also negative.

---
